# Supplementary material for: Single-cell correlations of mRNA and protein content in a human monocytic cell line after LPS stimulation
Source: PLoS One. 2019 Apr 19;14(4):e0215602. doi: 10.1371/journal.pone.0215602 (PMC6474627; doi:10.1371/journal.pone.0215602)
Supplement: S2 File — (XLSX) [file pone.0215602.s003.xlsx]

## Sheet:  Fig2 Histogram Data
mRNA Data						Intron bursting data
Cell #	IL1b mRNA 0min	TNFa mRNA 0min	IL1b mRNA 4hr	TNFa mRNA 1hr		IL1b Introns 0 min	IL1b Introns 1hr	TNFa Introns 0min	TNFa Introns 30min
1	0	0	192	31		0	3	0	0
2	1	0	356	90		0	0	0	2
3	0	0	47	10		0	0	0	1
4	5	4	261	28		0	0	0	0
5	17	14	357	26		0	0	0	0
6	1	1	205	7		0	1	0	0
7	0	1	183	60		0	0	0	0
8	5	0	634	129		0	0	0	0
9	120	3	8	51		0	0	0	0
10	0	10	142	114		0	0	0	1
11	81	0	445	75		0	0	0	1
12	8	0	33	46		0	2	0	0
13	9	5	0	48		0	2	0	0
14	7	1	300	4		0	0	0	1
15	91	2	334	4		0	1	0	0
16	83	2	98	125		0	0	0	2
17	13	0	316	39		0	1	0	3
18	0	0	133	69		0	0	0	2
19	2	4	357	45		0	2	1	3
20	1	0	219	23		0	0	0	0
21	1	1	164	328		0	1	1	0
22	23	3	25	512		0	0	0	0
23	2	2	32	60		0	0	0	1
24	5	0	75	273		0	0	0	0
25	5	6	363	131		0	0	0	3
26	35	10	72	152		0	0	0	0
27	34	25	71	50		0	1	0	0
28	34	25	372	82		0	0	0	2
29	69	2	393	45		0	0	0	0
30	43	5	90	115		0	0	0	2
31	206	5	71	12		1	0	0	0
32	26	1	3	56		0	2	0	0
33	20	1	63	15		0	2	0	0
34	1	0	39	15		0	0	0	0
35	5	1	4	12		2	0	0	0
36	0	2	294	4		1	0	0	1
37	89	4	228	14		0	0	0	0
38	37	6	45	45		0	0	0	0
39	11	1	30	23		2	1	2	2
40	12	1	101	20		0	0	0	1
41	1	0	306	17		0	2	0	1
42	2	2	34	2		0	3	0	2
43	3	0	293	96		0	0	0	2
44	1	2	2	116		1	0	0	2
45	73	1	162	95		0	0	0	0
46	1	3	156	9		0	0	0	0
47	34	4	37	138		0	0	0	0
48	3	0	34	35		0	2	0	1
49	21	1	169	339		0	0	0	0
50	8	10	75	59		0	0	0	0
51	16	2	492	76		1	1	0	0
52	0	3	437	13		0	0	0	1
53	100	7	305	109		0	0	0	1
54	53	1	331	72		0	5	0	2
55	2	0	63	251		0	1	0	1
56	4	4	125	38		0	2	0	1
57	32	0	551	44		0	1	0	1
58	4	1	235	347		0	1	0	0
59	0	1	184	169		0	0	0	1
60	77	0	258	119		0	0	0	2
61	76	1	183	150		0	0	0	0
62	26	2	6	16		0	0	0	0
63	40	4	40	126		1	2	0	2
64	135	1	58	111		0	0	0	0
65	0	0	185	34		0	0	0	0
66	19	1	76	255		0	0	0	0
67	30	1	97	52		0	6	0	2
68	27	0	353	410		0	0	0	1
69	5	2	48	280		0	0	0	0
70	14	6	125	306		1	2	0	0
71	16	0	74	115		1	0	0	1
72	15	0	740	7		0	1	0	0
73	26	10	53	4		0	3	0	0
74	26	2	186	10		0	0	0	1
75	4	6	248	347		0	0	0	0
76	1	2	9	77		0	4	0	0
77	14	0	2	1007		0	0	0	1
78	0	1	239	201		0	0	0	1
79	17	2	190	66		0	3	0	1
80	2	1	221	163		0	0	0	0
81	53	1	15	105		1	0	0	1
82	6	1	122	143		0	0	0	2
83	32	4	111	177		0	0	0	0
84	10	2	223	224		1	1	0	0
85	10	2	307	17		0	0	0	0
86	39	5	114	12		0	3	0	0
87	10	6	165	120		1	2	0	0
88	27	4	97	1		0	1	0	0
89	5	0	8	88		0	0	0	0
90	88	3	30	0		0	3	0	0
91	13	5	137	0		0	1	0	0
92	8	0	11	10		0	4	0	1
93	33	0	6	4		0	0	0	0
94	5	0	171	377		1	0	0	0
95	6	25	265	0		0	0	0	0
96	141	21	45	0		0	2	0	0
97	58	0	4	53		0	0	0	0
98	20	4	79	268		0	1	0	1
99	47	0	103	0		0	0	0	0
100	48	1	48	33		0	1	0	0
101	70	5	81	4		0	0	0	1
102	34	3	75	45		0	2	0	2
103	12	2	506	96		0	0	0	0
104	5	2	5	39		0	1	0	2
105	2	2	34	204		2	0	0	0
106	18	0	88	36		0	0	0	2
107	3	2	166	404		0	2	0	0
108	35	6	169	46		1	0	0	0
109	3	1	69	8		0	2	0	2
110	11	0	113	1		0	0	0	0
111	77	2	128	49		0	0	0	0
112	165	1	2	41		0	3	0	0
113	25	0	49	1		0	1	0	0
114	4	14	154	2		0	0	0	0
115	5	2	465	0		0	0	0	3
116	12	4	377	59		1	0	0	0
117	24	2	129	23		0	2	0	2
118	15	3	104	264		1	0	0	0
119	4	3	312	131		0	0	0	0
120	136	5	82	267		1	2	0	1
121	39	3	196	208		0	1	0	0
122	53	4	165	75		0	1	0	0
123	1	0	701	223		1	3	0	1
124	22	0	33	37		0	0	0	1
125	0	1	216	92		1	1	0	0
126	6	2	12	8		0	1	0	1
127	18	0	512	242		0	0	0	0
128	21	1	188	0		0	1	0	0
129	0	4	24	118		0	0	0	2
130	21	0	162	190		0	0	0	0
131	0	0	20	216		0	0	0	3
132	1	1	69	79		0	2	0	0
133	29	3	170	175		0	1	0	0
134	141	1	191	205		0	0	0	0
135	0	0	377	205		0	0	0	2
136	301	33	15	246		1	1	0	0
137	87	6	704	142		0	0	0	0
138	5	11	0	70		0	2	0	0
139	4	0	140	40		1	1	0	2
140	91	4	177	73		1	0	0	0
141	0	0	173	114		0	2	0	0
142	19	0	33	167		0	2	0	0
143	3	0	316	51		2	0	0	1
144	1	7	262	238		0	0	0	1
145	32	0	100	7		0	0	0	0
146	2	2	45	15		0	0	0	1
147	121	5	19	128		0	0	0	0
148	2	2	1	252		0	0	0	0
149	3	7	1	42		0	1	0	0
150	14	6	9	68		0	1	0	0
151	84	0	52	12		0	1	0	1
152	58	4	225	58		0	0	0	0
153	1	11	276	35		1	1	0	0
154	7	0	33	131		0	0	0	0
155	3	4	251	34		0	0	0	1
156	27	2	418	286		0	0	0	0
157	0	0	159	0		0	0	0	0
158	0	0	130	181		0	0	1	2
159	0	0	44	261		0	2	0	2
160	14	0	53	458		0	2	0	1
161	6	1	15	248		0	1	0	1
162	17	3	32	5		0	0	0	0
163	12	0	0	275		0	0	0	0
164	1	1	494	914		0	1	0	0
165	0	0	19	115		0	1	0	0
166	22	0	7	193		0	2	0	2
167	0	0	2	274		1	0	0	0
168	19	13	16	213		0	0	0	0
169	1	0	115	5		1	0	0	2
170	13	0	354	391		2	1	0	0
171	0	2	149	226		0	1	0	1
172	8	3	99	173		0	0	0	0
173	65	1	29	1		0	0	0	0
174	96	1	3	78		0	0	0	3
175	83	40	61	0		1	2	0	0
176	19	0	135	390		1	1	0	0
177	46	4	238	83		0	2	0	1
178	14	0	199	33		1	0	0	0
179	1	9	164	117		2	0	0	3
180	2	1	356	121		1	0	0	0
181	129	9	376	85		0	0	0	0
182	1	1	24	68		0	1	0	0
183	0	0	33	161		0	0	0	0
184	149	2	3	142		0	0	0	1
185	175	1	146	732		0	2	0	2
186	61	6	293	41		0	1	0	0
187	3	1	24	1		0	4	0	2
188	1	0	282	0		0	0	0	1
189	57	5	99	384		0	1	0	3
190	31	0	398	204		0	1	0	0
191	0	0	145	8		0	1	0	0
192	0	0	22	173		0	2	0	0
193	27	0	156	41		0	0	0	1
194	16	0	165	106		0	0	0	0
195	3	0	74	35		1	3	0	0
196	0	0	2	249		0	0	0	0
197	4	1	292	256		0	1	0	0
198	0	0	4	110		0	1	0	0
199	1	2	238	42		0	0	0	1
200	1	0	0	60		0	0	0	0
201	0	1	3	808		0	0	0	0
202	3	0	28	220		0	0	0	1
203	30	0	7	328		0	0	0	0
204	148	2	1	343		0	0	0	2
205	0	0	139	148		0	1	0	0
206	25	1	138	20		0	0	0	0
207	97	1	132	84		0	1	0	0
208	20	2	181	201		1	0	0	0
209	46	4	213	20		0	0	0	0
210	0	1	56	97		0	2	0	0
211	0	2	56	227		0	2	0	0
212	16	0	6	224		0	0	0	2
213	11	1	124	47		0	1	0	0
214	81	6	45	43		0	0	0	1
215	2	1	277	239		0	2	0	0
216	0	0	5	261		0	2	0	0
217	2	11	175	65		0	1	0	2
218	12	0	4	81		0	0	0	0
219	125	2	284	83		0	0	0	0
220	7	0	162	172		0	0	0	0
221	6	0	158	38		0	1	0	0
222	23	2	0	231		0	0	0	0
223	27	0	2	4		0	0	0	0
224	0	0	163	191		0	2	0	2
225	9	0	51	175		0	0	0	0
226	11	4	191	21		0	1	0	0
227	0	0	142	194		0	3	0	0
228	1	2	8	251		1	1	0	3
229	0	0	101	53		0	1	0	0
230	14	0	71	159		1	0	0	0
231	52	1	310	14		0	0	0	0
232	10	1	207	110		0	0	0	4
233	0	0	194	114		0	2	0	0
234	0	1	5	544		0	0	0	1
235	0	3	43	240		0	1	0	0
236	7	0	107	259		2	0	0	1
237	0	0	168	54		0	1	0	0
238	12	5	54	14		0	0	0	1
239	0	1	25	52		0	0	0	0
240	10	2	69	118		0	2	0	0
241	5	0	311	109		1	2	0	2
242	5	1	3	109		0	2	0	0
243	0	0	25	242		0	4	0	0
244	5	0	93	120		0	0	0	0
245	3	3	519	4		0	1	0	1
246	1	0	212	290		2	0	0	0
247	12	7	4	549		0	0	0	0
248	25	0	61	299		0	1	0	0
249	63	3	3	69		0	0	0	0
250	50	1	7	427		0	0	0	0
251	55	3	101	97		0	2	0	2
252	1	0	4	215		0	0	0	0
253	17	0	75	70		0	0	0	0
254	59	1	131	94		1	0	0	0
255	117	6	57	47		1	1	0	4
256	17	7	427	26		0	0	0	0
257	170	3	81	72		0	0	0	2
258	15	18	68	208		0	0	0	0
259	65	0	0	182		0	1	0	0
260	107	1	141	27		0	0	0	0
261	0	0	198	68		0	3	0	1
262	15	8	160	44		0	0	0	0
263	98	9	68	363		0	3	0	0
264	12	0	54	184		0	0	0	1
265	0	0	192	126		0	4	0	0
266	7	1	6	308		0	3	0	0
267	3	0	210	51		0	0	0	1
268	7	3	4	434		1	0	0	0
269	19	6	35	294		3	0	0	4
270	11	0	26	193		0	0	0	4
271	2	0	349	403		0	0	0	0
272	28	0	319	21		1	0	0	0
273	17	1	189	99		0	3	0	0
274	0	0	228	34		1	1	0	0
275	2	0	110	78		0	1	0	0
276	2	2	210	343		0	2	0	2
277	0	0	111	31		0	4	0	0
278	19	2	263	131		0	0	0	0
279	22	2	30	431		0	0	0	0
280	53	6	0	562		0	0	0	1
281	2	3	0	110		2	1	0	0
282	1	1	13	183		1	0	0	2
283	0	0	22	53		0	0	0	0
284	1	2	23	8		0	1	0	0
285	3	3	98	51		0	0	0	0
286	28	2	80	885		0	1	0	2
287	11	0	136	246		0	0	0	2
288	51	27	119	2		0	1	0	1
289	89	0	38	17		0	0	0	0
290	5	3	272	63		0	0	0	0
291	17	0	522	261		0	1	0	0
292	28	8	151	167		0	4	0	0
293	0	2	4	42		0	0	0	0
294	30	0	41	536		0	0	0	1
295	7	1	98	161		0	1	0	0
296	50	5	308	31		0	0	0	0
297	34	0	442	57		0	2	0	0
298	4	0	3	162		0	2	0	0
299	1	1	60	70		0	1	0	1
300	0	1	412	408		0	1	0	0
301	3	0	426	9		0	0	0	0
302	15	0	301	21		0	0	0	0
303	2	1	612	28		1	3	0	2
304	4	3	158	316		0	0	0	0
305	2	7	439	75		0	4	0	0
306	74	3	636	124		0	0	0	1
307	0	0	287	36		0	0	0	3
308	0	0	455	148		0	0	0	0
309	28	26	1010	210		0	0	0	0
310	42	4	304	1036		0	1	0	0
311	71	10	107	47		0	0	0	0
312	25	10	60	665		0	0	0	0
313	19	0	134	61		0	0	0	0
314	0	0	288	20		0	0	0	0
315	0	0	286	35		0	0	0	0
316	0	1	130	199		0	0	0	1
317	0	1	130	0		0	0	0	0
318	1	18	75	147		0	0	0	1
319	0	1	118	192		0	2	0	1
320	3	9	111	174		0	0	0	0
321	11	0	55	27		0	1	0	0
322	6	0	334	116		0	1	0	0
323	2	0	656	90		0	2	0	0
324	39	1	291	135		0	2	0	1
325	75	3	390	74		0	1	0	0
326	61	3	692	59		0	0	0	5
327	38	0	2	184		0	0	0	2
328	108	1	880	167		0	2	0	0
329	77	3	0	163		0	1	0	0
330	26	6	89	188		0	1	0	0
331	13	7	360	7		2	2	0	0
332	11	0	570	103		0	0	0	0
333	9	1	333	171		0	2	1	0
334	139	2	0	89		0	3	0	2
335	0	4	217	102		0	1	0	5
336	1	0	125	172		0	1	0	0
337	2	2	106	203		0	3	0	1
338	0	0	295	180		1	1	0	1
339	1	0	41	92		0	0	0	0
340	0	0	163	445		0	1	0	0
341	0	0	74	246		0	2	0	0
342	1	0	245	47		0	2	0	0
343	74	1	9	440		0	0	0	1
344	0	0	0	43		0	1	0	1
345	35	12	37	15		0	0	0	0
346	119	7	77	207		0	0	0	0
347	14	12	57	118		0	3	0	0
348	96	2	135	59		0	0	0	0
349	16	0	101	37		0	0	0	0
350	94	1	113	213		0	0	0	1
351	10	0	114	284		0	1	0	1
352	37	0	644	36		0	2	0	2
353	10	0	515	8		0	1	0	0
354	16	0	458	124		0	3	0	0
355	2	1	335	0		0	0	0	0
356	2	2	213	34		0	0	0	0
357	6	0	69	134		0	1	0	0
358	1	12	405	115		0	0	0	0
359	0	0	0	150		0	0	0	0
360	3	0	230	113		0	1	0	0
361	0	0	0	88		0	1	0	1
362	0	0	808	112		0	0	0	0
363	1	0	778	0		0	0	0	1
364	0	1	63	301		0	2	0	0
365	0	0	306	83		2	0	0	0
366	25	1	225	16		0	0	0	0
367	50	12	384	116		1	0	0	0
368	27	0	134	20		0	0	0	1
369	64	3	11	33		0	1	0	2
370	3	14	436	176		0	0	0	3
371	84	7	146	0		0	1	0	1
372	48	0	254	103		0	2	0	0
373	11	0	0	33		0	0	0	0
374	0	0	590	206		0	0	0	0
375	0	1	889	186		0	1	0	0
376	1	0	4	80		0	1	0	0
377	42	0	165	73		0	1	0	1
378	139	18	131	133		0	4	0	3
379	1	1	44	123		0	0	0	2
380	53	4	847	52		0	1	0	2
381	19	0	4	244		0	1	0	0
382	10	4	12	160		0	0	0	0
383	42	1	1188	54		0	0	0	0
384	1	0	66	31		0	2	0	2
385	97	1	17	238		0	1	0	0
386	163	9	202	265		0	0	0	0
387	37	0	312	53		0	0	0	1
388	45	23	123	12		0	1	0	0
389	48	0	36	91		0	0	0	0
390	59	7	74	20		0	2	0	1
391	90	8	155	62		0	0	0	2
392	0	0	286	128		0	0	0	0
393	7	3	884	17		0	0	0	0
394	27	0	192	181		0	1	0	1
395	1	0	321	352		0	0	0	1
396	8	11	2	670		0	0	0	1
397	19	1	16	120		0	1	0	0
398	1	0	72	435		0	1	0	1
399	7	2	0	216		0	0	0	2
400	0	2	119	54		0	3	0	0
401	0	3	229	204		0	1	0	0
402	19	0	150	11		0	1	0	0
403	2	0	142	196		0	2	0	0
404	75	3	18	148		0	0	0	0
405	11	1	54	27		0	2	0	0
406	0	0	16	271		0	0	0	0
407	13	1	23	228		0	0	0	0
408	119	10	205	93		0	0	0	1
409	2	0	3	34		0	0	0	0
410	5	11	239	94		0	0	0	1
411	2	3	240	25		0	1	0	0
412	9	12	152	221		0	0	0	2
413	8	1	305	230		0	0	0	1
414	41	0	805	93		0	1	0	0
415	4	1	153	99		0	0	0	3
416	0	0	410	180		0	0	0	0
417	26	0	0	46		0	0	0	0
418	0	1	483	59		0	2	0	0
419	15	0	151	129		1	1	0	1
420	2	0	205	1		0	2	0	0
421	123	1	24	21		0	1	0	3
422	58	0	649	114		0	0	0	0
423	2	1	102	52		0	0	0	0
424	46	2	91	66		0	0	0	1
425	4	3	0	159		2	1	0	0
426	14	0	353	128		0	0	0	0
427	55	0	21	37		0	2	0	0
428	4	0	67	150		0	2	0	0
429	4	0	323	272		0	1	0	2
430	33	1	7	68		0	0	0	0
431	42	4	247	120		0	1	0	0
432	0	0	38	192		0	0	0	1
433	3	0	507	21		0	0	0	0
434	0	2	185	24		0	0	0	0
435	6	2	83	1		0	1	0	3
436	2	0	75	3		0	2	0	0
437	87	0	371	181		0	0	0	0
438	103	1	386	106		0	0	0	0
439	2	0	246	134		0	0	0	0
440	39	0	103	96		0	0	0	4
441	42	1	365	24		0	1	0	0
442	38	0	830	91		0	0	0	0
443	6	0	361	106		0	0	0	0
444	47	1	192	57		0	1	0	2
445	12	0	470	107		0	0	0	0
446	2	0	595	45		0	1	0	0
447	28	0	210	108		0	2	0	0
448	69	3	241	70		0	1	0	0
449	0	0	471	12		0	0	0	0
450	40	0	465	33		0	0	0	0
451	0	1	135	7		0	0	0	4
452	8	0	118	103		0	1	0	1
453	0	2	61	43		0	2	0	0
454	0	0	29	156		0	0	0	0
455	0	0	362	131		0	0	0	0
456	3	5	1	89		0	0	0	1
457	1	6	784	251		0	4	0	1
458	11	3	1283	20		0	0	0	0
459	12	0	234	139		0	0	0	0
460	0	1	111	49		0	3	0	0
461	5	2	274	114		0	0	0	0
462	1	0	188	291		0	1	0	0
463	34	0	81	6		0	0	0	0
464	3	0	154	128		0	0	0	0
465	68	0	291	42		0	0	0	1
466	4	3	217	333		0	0	0	0
467	6	1	227	149		0	1	0	0
468	2	0	301	18		0	0	0	1
469	28	4	206	51		0	1	0	1
470	0	0	435	1		0	1	0	1
471	16	0	98	124		0	0	0	1
472	0	1	218	239		1	0	0	0
473	1	3	519	212		0	0	0	1
474	0	12	570	80		0	0	0	0
475	10	7	162	198		0	0	0	0
476	0	0	280	67		0	0	0	1
477	0	0	17	73		0	0	0	0
478	4	0	69	191		0	3	0	3
479	4	0	154	48		0	0	0	0
480	0	0	311	63		0	0	0	0
481	1	0	192	261		0	0	0	0
482	7	0	348	106		0	0	0	0
483	7	12	324	195		0	4	0	1
484	31	0	708	4		0	2	0	1
485	21	0	81	217		2	0	0	0
486	29	2	87	139		0	1	0	0
487	32	7	518	15		1	1	0	1
488	13	1	457	130		0	5	0	0
489	1	0	305	0		0	1	0	1
490	19	3	101	108		0	0	0	0
491	76	3	102	12		0	2	0	0
492	27	37	130	44		0	1	0	0
493	0	0	174	116		0	1	0	1
494	0	2	200	51		0	0	0	3
495	3	4	159	10		0	2	0	0
496	0	0	6	4		0	0	0	0
497	0	0	293	7		0	0	0	0
498	4	0	283	72		0	0	0	0
499	0	0	36	237		0	1	0	1
500	76	3	282	94		0	0	0	0
501	0	0	163	80		0	0	0	1
502	1	0	15	138		0	1	0	0
503	0	0	493	195		0	2	0	0
504	22	1	341	33		0	0	0	0
505	51	3	42	55		0	0	0	0
506	1	0	383	236		0	1	0	3
507	3	0	156	232		1	0	0	0
508	0	0	125	135		0	0	0	0
509	32	3	90	137		0	1	0	0
510	17	0	9	33		0	1	0	2
511	25	1	343	216		0	2	0	0
512	0	0	28	3		0	1	0	2
513	3	0	47	195		0	1	0	0
514	5	4	593	181		0	0	0	0
515	39	20	360	71		0	2	0	2
516	0	2	1	57		0	0	0	2
517	1	1	157	87		0	1	0	0
518	6	9	12	413		0	2	0	0
519	156	16	104	37		0	1	0	0
520	14	3	109	19		0	0	0	0
521	84	5	610	23		0	1	0	1
522	0	0	117	10		0	0	0	0
523	14	0	201	169		0	0	0	0
524	2	3	184	149		0	0	0	1
525	0	9	225	26		1	0	0	2
526	5	0	581	8		0	0	0	0
527	83	6	53	6		0	0	0	1
528	3	2	534	3		0	0	0	0
529	12	3	1841	129		0	0	0	0
530	38	15	183	7		0	0	0	0
531	26	2	254	185		0	0	0	0
532	62	7	803	193		0	2	0	1
533	3	0	102	181		0	2	0	0
534	409	6	123	1		0	0	0	0
535	0	0	176	2		0	0	0	0
536	1	0	80	51		0	1	0	1
537	2	5	276	24		0	0	0	3
538	1	1	17	170		0	0	0	0
539	0	0	225	17		0	0	0	0
540	4	1	203	210		0	1	0	0
541	2	4	8	178		0	0	0	0
542	0	0	67	69		0	0	0	0
543	255	5	36	19		0	0	0	1
544	9	0	92	4		0	1	0	0
545	1	0	219	49		0	0	0	0
546	0	2	83	60		0	1	0	0
547	2	3	112	0		0	0	0	1
548	3	3	241	7		2	1	1	1
549	2	12	76	25		0	1	1	0
550	67	5	12	41		0	0	0	0
551	10	1	873	22		0	0	0	0
552	106	6	447	122		0	0	0	1
553	47	3	191	187		0	0	0	0
554	70	5	542	61		0	0	0	0
555	60	3	225	69		0	3	0	0
556	4	5	741	248		0	0	0	1
557	108	2	197	115		2	0	0	0
558	21	24	43	39		0	1	0	2
559	2	10	444	40		0	0	0	0
560	111	12	70	6		0	0	0	0
561	24	2	16	326		0	0	0	0
562	0	1	648	69		0	1	0	1
563	37	14	511	37		0	0	0	0
564	6	1	61	3		0	0	0	0
565	12	6	414	62		1	0	0	0
566	0	0	320	24		2	0	0	0
567	1	1	26	26		0	0	0	0
568	5	1	184	107		0	0	0	1
569	12	2	13	3		0	0	0	3
570	22	5	145	73		0	1	0	0
571	0	1	65	68		0	1	0	0
572	4	3	41	44		0	2	0	0
573	4	0	94	275		0	2	0	0
574	7	2	431	35		0	3	0	1
575	4	0	186	141		0	0	0	2
576	37	0	185	44		0	0	0	1
577	22	2	290	95		0	1	0	1
578	3	0	12	61		0	0	0	3
579	5	0	124	274		0	0	0	0
580	3	2	183	557		0	0	0	0
581	73	12	221	1		0	1	0	0
582	84	1	465	5		0	0	0	0
583	0	3	1135	30		0	0	0	0
584	4	7	60	30		0	2	0	0
585	77	13	72	178		0	0	0	0
586	1	0	829	35		0	0	0	0
587	40	4	287	2		0	1	0	0
588	8	5	0	80		2	0	0	0
589	24	0	320	0		0	0	0	2
590	127	4	513	20		1	0	0	1
591	149	2	753	73		0	1	0	0
592	0	4	172	1		0	0	0	2
593	20	1	468	71		0	0	0	0
594	24	2	136	2		0	0	0	0
595	4	2	33	302		0	0	0	0
596	21	6	239	230		0	0	0	0
597	155	8	469	152		1	0	0	2
598	40	0	6	19		0	0	0	0
599	24	11	35	114		0	2	0	1
600	5	1	18	192		1	0	0	0
601	1	1	466	97		0	1	0	2
602	0	0	29	260		0	0	0	0
603	320	25	5	232		0	0	0	1
604	7	1	579	248		0	0	0	0
605	14	4	308	12		0	1	0	0
606	0	0	493	41		0	0	0	1
607	52	5	98	42		0	0	0	0
608	1	0	33	440		1	0	0	2
609	2	0	28	45		0	1	0	1
610	155	5	0	415		0	0	0	1
611	17	7	82	115		0	0	0	3
612	60	4	497	74		0	0	0	0
613	129	5	443	5		1	0	0	2
614	252	28	0	203		0	2	0	0
615	60	6	2	74		1	1	0	0
616	0	0	31	39		0	0	0	0
617	110	37	68	44		0	3	0	1
618	62	4	2	207		0	3	0	3
619	11	6	134	218		0	0	0	1
620	27	1	577	14		0	0	0	0
621	13	4	83	124		0	0	0	1
622	19	1	360	250		0	0	2	0
623	109	4	118	82		0	0	0	0
624	215	36	18	89		0	3	0	5
625	22	17	44	282		0	2	0	0
626	17	0	55	26		0	1	0	1
627	3	1	201	202		0	1	0	0
628	53	0	120	50		0	2	0	0
629	26	0	72	171		1	0	0	2
630	47	0	25	56		1	0	0	0
631	5	0	809	18		1	1	0	0
632	42	1	61	367		0	0	0	1
633	29	6	153	393		0	5	0	1
634	3	0	2	280		0	0	0	2
635	0	0	49	114		1	2	0	1
636	4	0	18	55		0	0	0	4
637	0	3	310	40		0	0	1	0
638	6	1	777	380		0	1	0	1
639	3	3	0	180		0	1	0	0
640	21	7	417	187		0	0	0	0
641	42	7	18	44		0	1	0	3
642	4	8	209	35		0	0	0	0
643	88	5	155	25		0	3	0	0
644	94	12	426	46		0	0	0	3
645	154	8	1041	113		0	1	0	2
646	196	6	466	290		0	2	0	1
647	7	3	341	199		0	0	0	0
648	29	9	187	238		0	0	0	4
649	72	16	618	247		0	1	0	0
650	86	5	66	632		0	1	0	2
651	167	2	204	47		0	0	0	1
652	45	15	113	240		0	1	0	0
653	107	3	218	44		0	0	0	1
654	0	0	15	111		0	0	2	1
655	0	6	60	28		0	0	0	1
656	5	12	84	348		0	0	1	0
657	0	0	36	128		0	0	0	0
658	16	8	699	24		1	0	0	1
659	0	2	765	50		0	0	0	0
660	16	2	175	238		0	0	0	3
661	28	7	440	79		0	1	0	0
662	38	4	185	80		0	0	0	1
663	239	5	304	70		0	0	0	0
664	47	3	106	12		0	1	0	0
665	51	1	1265	102		0	0	0	0
666	25	2	334	109		0	0	0	6
667	31	2	19	38		0	0	0	4
668	13	6	352	27		0	0	0	2
669	55	10	217	49		1	0	0	3
670	42	13	788	494		1	0	0	2
671	1	2	251	620		0	1	0	0
672	4	2	31	69		0	0	0	2
673	1	2	28	141		0	0	0	1
674	2	1	213	14		0	1	0	0
675	1	3	196	9		0	0	0	1
676	14	7	50	436		0	0	0	0
677	37	0	139	33		0	0	0	0
678	8	3	224	18		0	0	0	0
679	13	2	226	209		0	0	0	1
680	23	11	20	52		0	2	0	0
681	3	1	114	58		0	0	0	2
682	3	0	38	54		0	0	0	0
683	35	1	0	48		0	0	0	1
684	15	3	87	69		0	2	0	2
685	44	1	1340	76		0	0	0	0
686	9	3	29	128		0	0	0	0
687	11	7	212	194		0	0	0	1
688	65	21	325	263		0	0	0	4
689	129	2	799	142		0	1	0	1
690	0	0	349	158		0	1	0	0
691	12	3	320	200		0	0	0	1
692	147	1	291	132		0	0	0	2
693	30	2	159	195		0	0	0	2
694	166	4	914	30		0	1	0	0
695	30	1	187	20		0	0	0	0
696	246	1	181	28		0	0	0	1
697	52	0	128	38		0	0	0	0
698	8	0	26	1		0	0	0	0
699	65	4	68	22		0	0	0	0
700	4	0	309	241		0	0	0	0
701	0	8	403	171		0	0	0	0
702	55	7	532	399		0	0	0	0
703	4	0	248	588		0	1	0	0
704	0	0	439	78		0	0	0	4
705	27	3	229	122		0	0	0	0
706	24	15	158	133		0	1	0	1
707	6	6	2	262		0	0	0	0
708	1	1	527	207		0	1	0	2
709	0	1	113	1		0	0	0	0
710	2	1	232	3		0	1	0	2
711	1	2	106	326		0	1	0	1
712	0	2	296	78		0	0	0	0
713	1	0	116	229		0	1	0	0
714	238	1	2022	51		0	0	0	0
715	105	7	19	97		0	1	0	0
716	7	5	274	100		0	1	0	0
717	2	4	312	150		0	1	0	1
718	68	1	0	545		0	1	0	0
719	2	0	1	108		0	2	0	1
720	127	0	896	524		0	0	0	0
721	34	6	2012	10		2	0	0	1
722	1	1	155	7		0	2	0	2
723	1	0	406	44		0	1	0	1
724	0	1	511	248		0	1	0	1
725	158	0	0	166		0	0	0	0
726	9	0	1359	9		0	4	0	0
727	132	0	1203	46		0	2	0	0
728	15	4	162	156		0	2	0	1
729	1	0	1536	180		0	1	0	0
730	1	3	740	1		0	1	0	0
731	1	4	0	8		0	2	0	0
732	0	0	0	87		0	0	0	2
733	18	0	0	49		0	3	0	1
734	64	9	1602	236		0	1	0	0
735	7	0	87	141		0	0	0	2
736	9	42	305	155		0	2	0	1
737	12	2	394	36		0	4	0	0
738	122	8	12	548		0	1	0	1
739	112	13	0	54		0	1	0	1
740	3	19	1	164		0	0	0	0
741	0	0	0	148		0	0	0	1
742	16	4	599	358		0	0	0	2
743	12	4	661	303		0	2	0	3
744	22	3	1200	201		0	1	0	0
745	87	35	29	216		0	0	0	0
746	1	10	189	49		0	1	0	1
747	4	33	545	113		0	1	0	0
748	64	46	206	136		0	0	0	4
749	4	80	0	0		0	1	0	2
750	193	4	31	111		0	4	1	0
751	35	5	76	2		0	2	0	1
752	78	1	203	535		0	1	0	0
753	4	1	20	50		0	0	0	1
754	0	0	717	52		0	0	0	1
755	7	2	17	44		0	0	0	6
756	53	8	22	4		0	2	0	1
757	80	3	210	6		0	0	0	0
758	24	1	119	201		0	0	0	0
759	7	0	78	166		0	0	0	3
760	7	1	59	210		0	0	0	0
761	112	8	211	72		0	0	0	2
762	73	8	7	183		0	2	0	0
763	0	0	55	18		0	1	0	0
764	166	12	22	30		0	0	0	1
765	40	19	17	241		0	3	0	0
766	5	1	48	125		0	0	0	0
767	25	7	203	339		0	0	0	0
768	4	5	25	12		0	0	0	0
769	3	19	204	83		0	2	0	0
770	44	2	336	80		0	0	0	0
771	19	92	365	0		0	1	0	0
772	7	3	26	106		1	0	0	0
773	63	8	279	210		0	0	0	1
774	24	4	422	206		0	2	0	0
775	123	3	182	39		0	4	0	1
776	30	4	68	409		0	0	0	0
777	12	3	156	78		0	1	0	2
778	2	1	412	3		0	0	0	1
779	7	3	273	424		0	3	0	2
780	3	1	735	192		0	0	0	1
781	4	5	369	559		0	2	0	0
782	0	0	88	179		0	2	0	0
783	0	1	716	687		0	0	0	0
784	11	2	229	0		0	3	0	1
785	34	4	18	44		0	0	0	0
786	22	0	0	117		0	0	0	0
787	172	3	85	169		0	0	0	0
788	19	6	261	60		3	0	1	2
789	1	11	0	121		0	2	0	2
790	8	2	237	25		0	1	0	0
791	55	1	217	274		0	0	0	0
792	5	1	283	112		0	1	0	0
793	134	5	41	96		0	1	0	0
794	0	5	424	240		0	2	0	0
795	383	12	653	141		0	0	0	4
796	20	4	1206	302		0	0	0	0
797	1	2	382	79		0	0	0	0
798	19	0	340	59		0	2	0	2
799	121	2	453	64		0	0	0	4
800	89	1	24	125		3	2	0	0
801	37	1	340	233		0	3	0	1
802	1	4	155	93		0	3	0	1
803	25	122	68	5		0	0	0	1
804	2	0	255	22		0	1	0	1
805	11	3	277	202		0	0	0	1
806	1	0	119	32		0	1	0	0
807	1	6	219	49		0	1	0	0
808	1	3	206	613		0	2	0	1
809	2	3	142	29		3	1	1	2
810	0	5	836	43		0	0	0	1
811	8	20	27	47		0	1	0	1
812	3	2	444	42		0	0	0	0
813	5	12	238	2		1	0	0	0
814	6	3	126	36		0	0	0	0
815	4	2	685	9		0	2	0	1
816	0	2	133	11		0	1	0	2
817	224	12	564	304		0	0	0	0
818	12	0	20	2		0	0	0	0
819	43	5	17	4		0	2	0	0
820	5	0	350	6		0	1	0	1
821	5	0	312	6		0	1	0	2
822	2	5	705	131		0	0	0	0
823	156	2	818	182		0	0	0	2
824	64	10	10	1		0	1	0	0
825	13	0	586	483		0	0	0	0
826	0	1	55	1		0	2	0	0
827	2	2	127	84		0	3	0	0
828	6	1	1265	4		0	1	0	0
829	18	1	187	63		0	1	0	0
830	18	1	233	229		2	3	0	5
831	3	3	25	89		1	0	0	1
832	28	3	735	331		0	0	0	0
833	0	1	26	189		0	1	0	1
834	5	2	31	39		0	0	0	0
835	80	4	19	0		1	1	0	0
836	170	0	315	24		0	1	0	2
837	21	0	0	174		0	1	0	0
838	1	6	12	132		0	1	0	2
839	7	4	36	174		0	0	0	3
840	152	4	92	121		0	2	0	1
841	6	32	142	106		0	0	0	3
842	11	24	127	47		0	1	0	0
843	190	2	173	96		0	2	0	0
844	97	6	625	156		0	2	0	1
845	24	4	87	198		0	0	0	0
846	143	7	209	151		0	0	0	0
847	4	4	28	175		0	1	0	0
848	0	2	74	134		0	1	0	0
849	27	1	3	64		0	1	0	0
850	310	9	33	33		0	1	0	0
851	1	10	197	183		0	0	0	1
852	148	2	234	198		0	3	0	0
853	35	0	371	278		0	2	0	1
854	118	12	78	257		0	0	0	4
855	26	1	88	111		0	1	0	1
856	0	3	137	15		0	1	0	2
857	129	7	16	15		0	1	0	1
858	3	22	29	151		0	1	0	2
859	49	4	585	33		0	1	0	2
860	2	1	188	379		0	2	0	2
861	102	9	689	0		0	1	0	0
862	9	1	14	48		0	0	0	0
863	26	9	228	45		0	2	0	1
864	87	0	23	418		0	0	0	1
865	17	5	29	258		0	3	0	1
866	79	12	76	16		0	0	0	1
867	0	1	775	5		0	0	0	0
868	26	4	3	49		0	1	0	1
869	74	13	42	22		0	1	0	0
870	1	3	222	0		0	0	0	0
871	5	26	1	27		0	1	0	0
872	0	3	0	0		0	2	0	0
873	32	1	244	1		0	2	0	2
874	0	0	652	109		0	1	0	0
875	8	2	144	11		0	0	0	1
876	24	2	152	117		0	1	0	3
877	44	8	109	119		0	0	0	0
878	0	0	181	625		0	3	0	1
879	74	7	178	4		0	0	0	0
880	0	1	570	179		0	1	0	0
881	63	12	699	6		0	0	0	2
882	51	6	113	30		0	1	0	1
883	3	0	170	364		0	0	0	0
884	124	2	338	142		0	1	0	3
885	6	4	14	0		0	0	0	0
886	28	0	0	66		0	1	0	0
887	23	0	512	525		0	0	0	1
888	88	16	138	2		0	1	0	0
889	25	2	1076	103		0	0	0	0
890	85	6	25	226		0	1	0	0
891	34	9	155	29		1	2	0	1
892	82	23	343	382		0	0	0	0
893	17	44	56	73		1	0	0	2
894	4	0	10	91		0	1	0	1
895	107	0	60	54		0	0	0	0
896	8	0	26	13		0	1	0	0
897	20	3	1	18		0	0	0	0
898	193	7	18	176		0	1	0	1
899	5	8	52	63		0	1	0	0
900	34	6	114	54		0	5	0	1
901	14	9	2	86		0	1	0	1
902	161	0	281	269		0	0	0	0
903	0	2	194	307		0	0	0	1
904	4	1	325	135		0	0	0	0
905	165	2	135	64		0	3	0	1
906	18	0	110	109		0	3	0	4
907	36	1	213	67		0	1	0	0
908	13	2	175	18		0	0	0	0
909	7	0	240	74		0	1	0	1
910	29	2	101	30		0	1	0	2
911	76	2	224	19		0	3	0	1
912	20	4	333	276		0	2	0	0
913	17	3	36	20		0	1	0	1
914	89	2	190	65		0	2	0	0
915	216	24	0	7		0	1	0	0
916	18	3	214	93		0	0	0	3
917	59	22	59	94		0	1	0	0
918	7	40	105	19		0	0	0	0
919	2	5	5	43		0	0	0	0
920	2	10	0	21		0	0	0	0
921	62	1	81	311		0	1	0	2
922	99	6	43	65		0	1	0	2
923	8	5	120	104		0	2	0	2
924	29	3	181	48		0	0	0	0
925	15	11	132	47		0	1	0	0
926	0	0	1	109		0	0	0	0
927	8	0	3	86		0	0	0	3
928	168	11	26	2		0	0	0	1
929	9	18	115	26		0	1	0	0
930	39	0	45	18		0	1	0	0
931	35	15	56	35		0	1	0	0
932	13	23	564	88		0	0	0	0
933	25	15	183	193		1	1	0	2
934	17	4	0	15		0	0	0	0
935	7	1	46	63		0	0	0	1
936	13	0	0	30		0	2	0	2
937	0	2	34	19		0	2	0	0
938	11	3	467	323		0	1	0	0
939	17	3	591	30		0	1	0	1
940	8	9	1	25		0	4	0	0
941	897	134	956	18		0	1	0	0
942	115	2	321	58		0	0	0	0
943	3	27	373	110		0	0	0	0
944	184	8	52	75		0	2	0	0
945	87	1	195	333		0	1	0	0
946	77	15	12	47		0	1	0	1
947	39	1	0	61		0	2	0	3
948	6	0	137	49		0	0	0	2
949	1	0	0	10		0	1	0	1
950	6	2	0	111		0	1	0	1
951	61	10	55	49		0	2	0	1
952	15	1	105	37		0	0	0	0
953	14	0	319	32		0	2	0	1
954	11	1	57	104		0	4	0	3
955	18	0	42	45		0	0	0	2
956	6	3	41	26		0	1	0	0
957	64	8	5	13		0	2	0	1
958	549	62	62	30		0	2	0	2
959	8	11	193	195		0	0	0	1
960	89	13	244	71		0	1	0	1
961	16	0	1006	110		0	0	0	0
962	235	1	278	24		0	2	0	2
963	56	0	244	44		0	2	0	1
964	42	0	293	202		0	0	0	3
965	7	3	434	121		0	1	0	0
966	7	1	60	6		0	0	0	2
967	14	12	211	8		0	0	0	1
968	18	0	63	2		0	1	0	1
969	0	1	928	2		0	0	0	1
970	0	0	152	63		0	0	0	0
971	1	8	34	43		0	1	0	0
972	0	5	1	91		0	0	0	1
973	11	1	0	5		0	0	0	2
974	0	2	538	80		0	1	0	1
975	55	1	0	140		0	1	0	0
976	4	0	64	126		0	0	0	2
977	6	0	82	62		0	2	0	1
978	28	1	268	11		0	3	0	2
979	0	5	24	56		0	0	0	1
980	21	4	72	2		0	1	0	1
981	22	1	13	126		0	1	0	2
982	3	7	1	0		0	3	0	0
983	0	1	198	2		0	0	0	1
984	7	71	135	19		0	0	0	0
985	45	14	169	5		0	1	0	0
986	3	7	160	46		0	2	0	0
987	17	31	200	40		0	1	0	0
988	5	5	34	5		0	1	0	0
989	39	10	348	43		0	1	0	1
990	6	6	116	1		0	2	0	1
991	6	3	77	19		0	0	0	0
992	5	0	27	159		0	2	0	0
993	27	8	43	2		0	1	0	0
994	2	0	0	25		0	0	0	1
995	18	1	14	2		0	1	0	0
996	0	0	172	212		0	1	0	0
997	4	9	263	75		0	0	0	0
998	1	1	129	6		0	0	0	0
999	3	8	230	56		0	3	0	2
1000	2	0	282	44		0	1	0	4
1001	17	2	45	41		0	2	0	2
1002	0	1	135	63		0	1	0	0
1003	130	45	290	178		0	0	0	1
1004	1	8	304	322		0	3	0	0
1005	91	13	168	43		0	1	0	1
1006	35	18	215	116		0	2	0	0
1007	98	16	177	24		0	2	0	0
1008	59	7	370	9		0	1	0	3
1009	3	7	273	238		0	0	0	0
1010	4	0	229	192		0	0	0	3
1011	154	3	344	76		0	4	0	0
1012	8	1	160	81		0	2	0	0
1013	3	0	328	246		0	2	0	3
1014	44	0	583	13		0	0	0	1
1015	0	4	2	11		0	1	0	1
1016	0	2	97	61		0	0	0	1
1017	0	6	0	76		0	0	0	1
1018	0	0	178	314		0	0	0	0
1019	15	14	2	76		0	3	0	2
1020	0	4	13	9		0	0	0	2
1021	0	6	6	309		0	1	0	0
1022	0	0	60	431		0	0	0	1
1023	0	0	219	38		0	1	0	0
1024	0	0	242	24		0	0	0	0
1025	0	0	280	2		0	2	0	0
1026	0	0	170	150		0	1	0	1
1027	0	2	142	71		0	0	0	0
1028	0	3	176	121		0	0	0	0
1029	0	0	108	246		0	2	0	4
1030	1	0	30	47		3	0	0	0
1031	1	0	203	3		0	0	0	2
1032	15	5	36	32		0	1	0	1
1033	10	3	12	311		0	0	0	2
1034	1	4	29	72		0	1	0	1
1035	4	2	560	152		0	1	0	1
1036	0	0	80	23		0	3	0	0
1037	13	3	490	225		0	0	0	0
1038	0	0	84	71		0	4	0	0
1039	90	2	0	130		0	3	0	0
1040	1	2	46	440		1	0	0	0
1041	2	2	8	20		0	0	0	0
1042	0	0	18	135		1	1	0	0
1043	0	0	2	148		0	1	0	0
1044	135	0	12	165		0	2	0	3
1045	19	0	36	20		0	1	0	1
1046	0	0	92	420		0	0	0	1
1047	60	0	339	6		2	0	0	0
1048	9	1	250	66		0	2	0	0
1049	1	0	12	241		0	1	0	0
1050	5	5	136	61		0	1	0	0
1051	2	1	266	29		0	0	0	2
1052	2	2	149	4		0	0	0	1
1053	17	5	0	18		0	1	0	0
1054	6	1	176	236		0	0	0	4
1055	26	4	259	244		0	0	0	0
1056	1	2	10	132		0	2	0	1
1057	7	0	34	32		0	0	0	1
1058	4	0	60	14		0	3	0	0
1059	18	6	819	138		0	3	0	0
1060	0	0	35	42		0	0	0	2
1061	31	3	111	46		0	3	0	0
1062	33	4	42	220		0	0	0	0
1063	0	3	408	90		0	0	0	0
1064	15	2	22	13		0	0	0	1
1065	159	7	259	62		0	1	0	0
1066	32	3	61	36		0	0	0	0
1067	11	1	245	109		0	1	0	0
1068	39	7	467	196		0	0	0	1
1069	1	0	171	292		0	2	0	0
1070	46	2	0	114		0	4	0	1
1071	16	1	168	168		0	1	0	0
1072	2	4	154	240		0	3	0	1
1073	5	0	832	552		0	1	0	3
1074	93	8	119	21		0	0	0	2
1075	3	1	184	72		0	0	0	2
1076	80	3	183	162		0	1	0	4
1077	10	0	183	216		0	0	0	0
1078	178	3	531	204		0	0	0	3
1079	0	7	339	92		0	0	0	0
1080	20	0	148	47		0	0	0	0
1081	1	4	64	3		0	0	0	3
1082	0	1	2	21		0	3	0	0
1083	31	1	76	301		0	2	0	0
1084	113	2	491	3		0	0	0	4
1085	1	0	847	16		0	2	0	0
1086	10	4	53	191		0	1	0	1
1087	16	0	16	187		1	1	0	2
1088	24	2	69	116		0	0	0	0
1089	22	4	178	103		0	2	0	0
1090	55	3	21	167		0	0	0	0
1091	121	16	338	101		0	0	0	3
1092	3	0	144	12		0	1	0	2
1093	19	1	6	52		0	0	0	0
1094	62	0	0	267		0	1	0	0
1095	8	1	0	144		0	0	0	0
1096	8	0	60	32		0	3	0	0
1097	2	1	231	16		0	2	0	0
1098	0	0	89	390		0	1	0	1
1099	1	0	242	232		0	1	0	1
1100	1	0	28	67		0	0	0	0
1101	211	0	403	433		0	0	0	0
1102	7	0	286	470		0	3	1	0
1103	1	0	403	147		0	0	1	1
1104	8	0	282	272		1	2	0	5
1105	41	0	47	170		0	0	0	3
1106	287	18	51	230		0	1	0	1
1107	10	0	383	162		0	2	0	2
1108	3	1	0	67		0	0	0	1
1109	23	2	22	26		0	2	0	0
1110	1	0	378	106		0	2	0	0
1111	0	0	253	85		0	0	0	1
1112	11	4	398	143		1	3	0	3
1113	12	0	164	27		0	0	0	2
1114	0	0	582	301		0	0	0	1
1115	0	0	136	488		1	0	0	1
1116	0	0	78	151		0	3	0	2
1117	118	1	71	36		0	0	0	0
1118	0	0	281	26		0	0	0	0
1119	0	1	141	38		0	0	0	0
1120	2	0	2	32		0	1	0	1
1121	53	7	150	119		0	1	0	2
1122	61	5	311	118		0	4	0	2
1123	7	4	64	18		0	0	0	2
1124	7	4	104	301		0	1	0	2
1125	0	0	0	76		0	1	0	0
1126	83	12	27	42		0	0	0	1
1127	3	0	345	291		0	0	0	0
1128	5	4	28	68		0	0	0	0
1129	2	4	4	35		0	1	0	0
1130	15	0	104	353		0	0	0	0
1131	0	0	94	76		0	1	0	0
1132	0	0	271	77		0	1	0	2
1133	18	1	2	9		0	1	0	0
1134	25	0	168	54		0	0	0	1
1135	5	0	606	173		1	0	0	0
1136	29	0	1	84		0	1	0	2
1137	17	0	2	376		1	2	0	0
1138	0	0	0	297		0	1	0	1
1139	63	0	488	89		2	1	0	1
1140	51	0	233	175		0	0	0	0
1141	37	0	140	19		0	0	1	1
1142	55	0	9	159		0	0	0	0
1143	4	10	26	58		0	0	0	0
1144	34	0	172	281		0	0	0	2
1145	10	0	6	111		0	3	0	0
1146	0	0	252	21		0	3	0	0
1147	92	2	231	83		0	1	0	3
1148	10	4	426	13		0	0	0	0
1149	96	3	232	268		0	0	0	2
1150	3	6	424	330		0	1	0	1
1151	0	0	101	401		0	0	0	0
1152	4	3	159	35		0	1	0	1
1153	0	1	303	152		0	0	0	3
1154	0	0	414	46		0	0	0	1
1155	46	5	6	186		0	1	0	0
1156	38	1	46	84		1	0	0	0
1157	12	2	288	0		0	0	0	1
1158	23	1	706	112		0	0	0	0
1159	42	0	639	16		0	2	0	0
1160	11	3	78	76		0	0	0	0
1161	7	2	116	3		0	2	0	0
1162	2	2	209	17		0	0	0	0
1163	10	10	26	51		0	0	0	0
1164	9	3	111	75		0	1	0	0
1165	106	15	93	1		0	0	0	1
1166	5	0	297	54		0	0	0	0
1167	4	2	458	87		0	2	0	2
1168	6	4	25	250		0	0	0	0
1169	10	1	190	57		0	1	0	0
1170	117	9	59	18		0	0	0	0
1171	376	19	228	187		0	0	0	0
1172	17	0	188	12		2	0	0	0
1173	0	3	159	924		0	1	0	1
1174	23	2	51	90		0	2	0	0
1175	1	9	130	84		1	3	0	0
1176	16	1	38	242		0	1	0	0
1177	6	0	160	148		0	4	0	0
1178	1	0	5	53		0	1	0	0
1179	13	10	304	170		0	3	0	0
1180	23	2	213	74		0	3	0	1
1181	13	0	174	68		0	1	0	0
1182	6	1	478	230		0	0	0	0
1183	3	0	138	116		0	1	0	0
1184	9	0	107	221		0	0	0	0
1185	6	3	21	87		1	0	0	0
1186	6	3	284	115		1	0	0	0
1187	2	3	292	23		1	0	0	0
1188	41	6	91	244		0	1	0	1
1189	139	37	341	35		0	2	0	0
1190	13	0	82	62		0	4	0	1
1191	7	4	152	94		0	0	0	2
1192	2	2	135	387		1	0	0	0
1193	8	1	69	68		0	2	0	0
1194	64	5	426	332		0	1	0	0
1195	4	4	104	741		0	0	0	2
1196	1	1	103	31		0	0	0	0
1197	102	12	0	683		0	0	0	0
1198	0	0	221	204		0	1	0	0
1199	1	0	18	7		0	1	0	0
1200	8	0	100	59		1	2	0	0
1201	1	1	555	216		1	3	0	0
1202	9	0	0	49		0	2	0	0
1203	6	5	34	12		0	2	0	0
1204	11	7	336	108		0	0	0	0
1205	10	2	1	144		0	2	0	0
1206	36	0	0	190		0	1	0	0
1207	258	1	410	31		0	1	0	0
1208	2	2	37	175		0	2	0	3
1209	17	0	237	1139		0	2	0	4
1210	15	1	0	12		0	1	0	0
1211	24	1	44	94		0	3	0	1
1212	144	9	146	33		0	1	0	0
1213	4	0	213	70		0	0	0	0
1214	23	1	20	96		0	0	0	0
1215	4	0	68	28		0	3	0	0
1216	35	4	43	81		0	1	0	0
1217	3	9	453	1		0	0	0	0
1218	1	0	18	1		0	0	0	0
1219	145	5	43	157		0	2	0	1
1220	67	0	4	151		0	0	0	0
1221	0	2	34	47		0	0	0	0
1222	35	11	146	64		0	1	0	0
1223	20	10	328	622		0	5	0	0
1224	2	2	109	55		0	0	0	0
1225	19	13	298	37		0	2	0	1
1226	6	7	62	189		0	1	0	0
1227	14	15	8	299		0	0	0	0
1228	28	2	263	213		1	0	0	0
1229	10	0	230	151		0	0	0	4
1230	128	1	72	255		1	3	1	0
1231	6	2	192			0	5	0	2
1232	9	1	53			0	0	0	0
1233	16	0	257			0	0	0	0
1234	0	0	423			1	0	0	0
1235	12	0	598			0	0	0	1
1236	89	8	180			1	2	0	0
1237	1	0	538			0	1	0	2
1238	13	0	193			1	2	0	0
1239	2	23	120			0	0	0	0
1240	2	4	196			0	0	0	0
1241	1	0	4			0	1	0	1
1242	21	8	12			1	1	0	0
1243	44	0	292			0	1	0	1
1244	86	0	158			0	1	0	0
1245	0	1	263			0	0	0	0
1246	13	11	95			0	4	0	0
1247	4	5	286			0	0	0	2
1248	50	12	246			0	1	0	1
1249	3	3	66			0	0	0	0
1250	15	2	31			0	1	0	0
1251	12	13	468			0	1	0	0
1252	176	1	282			1	0	0	1
1253	26	1	325			0	0	0	1
1254	19	1	391			0	3	0	0
1255	132	2	170			0	0	0	1
1256	137	1	87			0	1	0	0
1257	13	1	230			0	0	0	2
1258	16	2	514			0	1	0	0
1259	13	2	208			0	2	0	1
1260	262	11	39			0	0	0	0
1261	27	9	10			1	0	0	2
1262	0	1	273			0	0	0	0
1263	1	1	162			0	0	0	0
1264	4	3	89			0	0	0	0
1265	360	24	26			1	1	0	1
1266	49	11	133			0	0	0	0
1267	24	32	14			0	1	0	0
1268	1	3	135			0	1	1	0
1269	33	3	1			0	0	0	0
1270	25	1	49			0	1	0	0
1271	88	11	3			1	0	0	0
1272	6	3	376			0	2	0	1
1273	0	0	664			0	4	0	0
1274	2	0	265			0	3	0	0
1275	76	13	110			0	0	0	0
1276	1	0	158			0	0	0	0
1277	1	1	109			0	2	0	0
1278	18	7	874			0	0	0	0
1279	13	2	236			0	0	0	0
1280	27	6	1551			0	2	0	0
1281	3	2	343			0	1	0	0
1282	10	0	24			0	3	0	3
1283	10	0	1			0	0	0	1
1284	41	3	100			0	1	0	0
1285	165	13	62			1	0	0	0
1286	0	0	453			2	3	0	0
1287	50	1	1010			0	1	0	0
1288	3	3	272			0	1	0	0
1289	0	0	652			0	0	0	0
1290	2	1	298			0	1	0	1
1291	132	24	588			0	0	0	1
1292	9	2	294			0	0	0	0
1293	3	2	0			0	0	0	0
1294	21	4	175			0	1	0	0
1295	0	0	182			0	2	0	1
1296	0	0	192			0	0	0	1
1297	2	0	71			0	0	0	2
1298	35	4	24			0	0	0	1
1299	3	1	73			0	2	0	0
1300	0	0	294			1	1	0	0
1301	24	10	384			0	2	0	0
1302	0	0	171			0	2	0	0
1303	210	4	443			1	2	0	0
1304	166	8	284			0	0	0	0
1305	33	4	606			0	2	0	0
1306	46	13	13			0	0	0	0
1307	88	16	84			0	0	0	0
1308	3	0	66			0	0	0	0
1309	11	5	116			0	0	0	0
1310	1	2	55			1	2	0	0
1311	102	22	490			0	0	0	0
1312	77	3	0			0	0	0	0
1313	9	3	52			1	2	0	0
1314	0	1	55			0	0	0	0
1315	175	2	332			0	1	0	0
1316	12	7	781			0	0	0	0
1317	31	1	117			0	2	0	0
1318	3	0	87			1	2	0	0
1319	97	9	39			0	0	0	0
1320	115	2	101			0	1	0	0
1321	155	1	34			1	0	0	0
1322	15	1	115			0	2	0	0
1323	44	15	481			1	2	0	0
1324	23	0	0			1	0	0	0
1325	20	5	6			0	0	0	0
1326	1	0	72			0	2	0	0
1327	22	1	97			0	2	0	0
1328	30	2	27			0	0	0	0
1329	12	5	36			0	4	0	0
1330	0	0	249			1	0	1	0
1331	17	0	186			0	2	0	0
1332	52	5	359			0	1	0	0
1333	13	1	696			0	1	0	0
1334	8	1	259			0	1	0	0
1335	65	2	99			0	0	0	0
1336	5	1	339			0	1	0	0
1337	28	3	62			0	3	0	0
1338	3	0	614			2	0	0	3
1339	38	1	341			0	0	0	1
1340	0	2	108			1	2	0	0
1341	151	5	276			0	1	0	0
1342	37	6	396			1	1	0	0
1343	141	1	114			0	3	0	0
1344	32	0				0	3	0	1
1345	43	1				0	1	0	0
1346	240	4				0	2	0	0
1347	29	13				0	0	0	0
1348	18	1				0	1	0	0
1349	102	3				0	1	0	0
1350	14	1				0	0	0	2
1351	5	3				0	1	0	0
1352	44	2				0	1	0	0
1353	8	27				0	2	0	0
1354	68	6				2	0	0	0
1355	43	3				2	1	0	0
1356	0	0				0	2	0	0
1357	20	0				1	0	0	0
1358	1	0				0	2	0	0
1359	0	4				0	2	0	0
1360	39	6				0	2	0	1
1361	11	7				1	0	0	0
1362	35	1				0	1	0	1
1363	8	9				0	1	0	0
1364	33	6				0	0	0	0
1365	2	2				0	3	0	0
1366	51	2				0	2	0	0
1367	16	11				0	0	0	1
1368	1	8				1	2	0	0
1369	149	7				0	1	0	0
1370	36	15				0	1	0	1
1371	25	1				0	1	0	2
1372	3	7				0	0	0	0
1373	21	10				0	1	0	0
1374	51	3				0	1	0	0
1375	12	0				0	2	0	0
1376	1	11				1	1	0	0
1377	0	0				0	3	0	0
1378	160	4				0	0	0	0
1379	29	5				0	0	0	0
1380	0	0				0	0	0	0
1381	0	2				0	1	0	0
1382	1	2				0	0	0	0
1383	3	3				0	0	0	0
1384	4	5				0	3	0	0
1385	23	1				0	0	0	0
1386	92	6				0	0	0	0
1387	2	3				0	0	0	0
1388	15	8				0	2	0	0
1389	6	3				1	0	0	0
1390	12	5				0	0	0	0
1391	82	29				0	0	0	0
1392	4	16				0	1	0	0
1393	45	11				1	0	0	0
1394	9	8				0	0	0	0
1395	5	4				1	3	0	0
1396	53	2				0	0	0	0
1397	9	5				1	2	0	0
1398	69	0				0	2	0	0
1399	37	0				0	2	0	0
1400	152	4				1	0	0	0
1401	28	2				0	2	0	0
1402	81	4				1	0	0	0
1403	8	2				1	0	0	0
1404	11	7				0	1	0	0
1405	79	1				0	2	0	0
1406	38	0				0	2	0	0
1407	2	7				0	2	0	0
1408	103	6				1	1	0	0
1409	164	13				0	0	0	0
1410	90	9				0	1	0	0
1411	97	13				0	0	0	0
1412	102	2				0	3	0	0
1413	51	7				0	1	0	0
1414	99	3				0	0	0	0
1415	17	2				0	1	0	0
1416	9	2				0	0	0	0
1417	76	2				0	2	0	0
1418	25	0				1	0	0	0
1419	0	0				0	2	0	0
1420	5	1				0	2	0	0
1421	8	0				2	2	0	0
1422	2	0				0	2	0	0
1423	250	1				0	0	0	0
1424	2	0				0	1	1	0
1425	1	0				0	1	0	0
1426	72	7				1	0	0	0
1427	4	0				0	3	0	1
1428	86	1				0	0	0	0
1429	1	8				0	0	0	0
1430	4	16				0	2	0	1
1431	141	1				0	0	0	1
1432	12	9				0	0	0	0
1433	2	2				1	2	0	0
1434	2	5				1	0	0	0
1435	6	6				1	1	0	0
1436	1	2				1	0	0	0
1437	1	6				0	1	0	0
1438	24	14				1	1	0	0
1439	8	6				0	0	0	0
1440	7	4				0	2	0	0
1441	51	4				0	0	0	0
1442	74	3				0	0	0	1
1443	232	24				2	0	0	0
1444	31	2				0	1	0	0
1445	17	9				0	0	0	0
1446	25	1				0	2	0	0
1447	0	1				0	1	0	0
1448	1	5				0	3	0	0
1449	7	3				0	1	0	0
1450	0	0				1	1	0	0
1451	29	0				0	2	0	0
1452	38	2				0	1	0	0
1453	2	9				0	0	0	0
1454	70	3				0	1	0	0
1455	29	0				0	1	0	0
1456	56	2				0	1	0	0
1457	114	2				2	0	0	0
1458	1	0				0	0	0	0
1459	50	14				0	1	0	1
1460	0	2				0	2	0	0
1461	47	1				0	1	0	0
1462	34	1				0	5	0	0
1463	32	1				0	1	0	0
1464	39	19				0	2	0	0
1465	6	1				0	3	0	0
1466	7	0				0	2	0	0
1467	163	9				0	3	0	1
1468	22	10				0	0	0	0
1469	7	1				0	2	0	0
1470	5	0				0	0	0	0
1471	0	1				0	1	0	1
1472	0	0				0	0	0	0
1473	0	0				0	1	0	0
1474	49	0				0	1	0	0
1475	40	4				0	4	0	0
1476	10	2				2	2	0	2
1477	145	15				0	1	0	0
1478	1	13				0	1	0	0
1479	8	3				0	2	0	0
1480	0	1				1	4	0	0
1481	2	10				0	2	0	0
1482	0	3				0	0	0	0
1483	187	2				0	1	0	0
1484	0	0				0	0	0	0
1485	0	0				0	1	0	1
1486	6	5				0	1	0	0
1487	1	5				0	0	0	0
1488	16	13				0	0	0	0
1489	16	5				0	0	0	0
1490	4	13				0	2	0	1
1491	6	7				0	1	0	1
1492	20	0				0	2	0	0
1493	4	4				0	3	0	0
1494	2	11				0	1	0	0
1495	35	7				0	2	0	0
1496	15	0				0	0	0	1
1497	12	6				0	2	0	2
1498	0	0				0	0	0	0
1499	38	0				0	0	0	0
1500	7	6				0	2	0	0
1501	7	3				0	0	0	0
1502	63	0				0	1	0	0
1503	91	25				0	2	0	0
1504	1	4				0	2	0	1
1505	4	0				0	1	0	0
1506	22	5				0	3	0	0
1507	41	0				0	0	0	0
1508	1	0				0	0	0	0
1509	1	2				0	1	0	0
1510	43	6				0	1	0	0
1511	6	2				0	2	0	1
1512	4	2				0	3	0	1
1513	35	0				0	0	0	0
1514	33	5				0	0	0	0
1515	211	2				0	2	0	0
1516	59	0				0	1	0	0
1517	53	1				0	0	0	0
1518	40	1				0	2	0	0
1519	85	2				0	0	0	1
1520	3	9				0	1	0	0
1521	8	9				0	2	0	0
1522	3	1				0	0	0	0
1523	17	0				0	1	0	0
1524	27	12				0	1	0	0
1525	84	3				0	2	0	1
1526	74	0				1	4	0	0
1527	0	18				0	1	0	0
1528	1	0				0	3	0	2
1529	28	3				0	0	0	0
1530	13	2				0	2	0	0
1531	124	1				0	1	0	0
1532	36	3				0	1	0	0
1533	25	1				0	0	0	0
1534	0	3				0	1	0	0
1535	9	11				0	0	0	0
1536	39	2				0	0	0	0
1537	19	4				0	1	0	0
1538	0	0				0	2	0	0
1539	124	14				0	2	0	0
1540	44	6				0	5	0	0
1541	6	0				0	2	0	0
1542	1	0				0	0	0	0
1543	17	4				0	0	0	0
1544	113	0				0	0	0	0
1545	12	14				0	2	0	0
1546	20	13				0	1	0	0
1547	9	0				0	2	0	0
1548	1	1				0	2	0	2
1549	2	0				0	1	0	1
1550	0	1				0	0	0	0
1551	4	1				0	0	0	0
1552	2	0				0	0	0	0
1553	11	1				0	1	0	0
1554	7	10				0	1	0	0
1555	0	0				0	0	0	0
1556	0	1				0	0	0	0
1557	4	1				0	3	0	0
1558	41	0				0	0	0	0
1559	23	14				0	0	0	0
1560	103	2				0	3	0	0
1561	26	10				0	1	0	0
1562	28	3				0	2	0	0
1563	0	0				0	2	0	1
1564	26	1				0	0	0	0
1565	103	0				0	5	0	0
1566	89	3				0	3	0	1
1567	123	1				0	2	0	0
1568	28	3				0	0	0	0
1569	92	4				0	0	0	0
1570	24	1				1	2	0	0
1571	5	0				0	1	0	0
1572	2	3				0	1	0	0
1573	82	0				0	0	0	0
1574	53	13				0	4	0	0
1575	0	2				0	1	0	0
1576	31	8				0	2	0	0
1577	3	2				0	2	0	0
1578	8	1				0	3	0	0
1579	7	9				0	1	0	0
1580	1	0				0	1	0	0
1581	41	16				0	0	0	0
1582	0	0				1	2	0	0
1583	1	2				0	2	0	0
1584	1	3				0	0	0	0
1585	0	4				0	1	0	0
1586	23	3				0	2	0	0
1587	25	22				2	0	0	0
1588	9	8				0	1	0	0
1589	70	3				0	0	0	0
1590	11	0				0	0	0	0
1591	7	6				0	2	0	0
1592	0	0					3		0
1593	55	1					3		0
1594	32	2					0		0
1595	1	2					1		0
1596	49	0					5		0
1597	17	0					4		1
1598	64	4					3		0
1599	0	2					1		0
1600	0	6					0		0
1601	0	0					1		0
1602	11	4					1		0
1603	0	0					4		0
1604	1	2					0		0
1605	5	0					2		0
1606	4	4					2		0
1607	4	15					0		0
1608	2	0					2		0
1609	42	1					0		0
1610	9	5					0		0
1611	189	5					3		0
1612	2	11					1		0
1613	115	8					1		0
1614	62	4					2		0
1615	173	2					2		0
1616	30	1					1		0
1617	3	0					0		0
1618	4	2					3		0
1619	0	1					1		0
1620	16	0					0		0
1621	0	0					1		0
1622	16	1					1		2
1623	26	6					0		0
1624	17	2					3		0
1625	91	2					0		1
1626	18	5					2		1
1627	0	4					1		2
1628	37	16					1		0
1629	0	0					2		1
1630	26	12					0		4
1631	5	0					0		2
1632	8	8					0		0
1633	0	0					4		0
1634	59	5					0		0
1635	0	0					1		1
1636	0	0					4		0
1637	0	0					0		1
1638	0	5					6		3
1639	6	3					1		1
1640	0	1					2		0
1641	0	4					1		0
1642	0	1					0		0
1643	6	6					0		0
1644	34	3					2		0
1645	0	2					1		1
1646	0	8					3		0
1647	28	9					3		0
1648	5	5					4		2
1649	19	4					1		0
1650	0	1					4		3
1651	0	2					1		0
1652	2	3					0		2
1653	5	4					0		0
1654	0	1					1		5
1655	3	2					1		1
1656	0	2					0		0
1657	2	6					0		1
1658	0	1					0		1
1659	0	3					1		0
1660	3	14					2		0
1661	1	0					2		0
1662	0	4					0		1
1663	1	1					2		1
1664	0	1					0		0
1665	0	0					0		0
1666	0	0					1		0
1667	0	0					0		3
1668	49	4					2		2
1669	0	4					4		1
1670	26	0					1		1
1671	0	0					0		2
1672	115	10					0		2
1673	10	7					0		2
1674	14	4					1		2
1675	2	1					1		2
1676	6	8					0		0
1677	3	3					5		1
1678	49	4					0		2
1679	13	4					2		0
1680	2	3					2		0
1681	115	10					0		2
1682	7	1					7		0
1683	272	5					3		2
1684	0	2					2		0
1685	303	0					1		0
1686	11	4					2		1
1687	6	2					2		0
1688	41	0					1		2
1689	12	0					3		1
1690	177	5					3		0
1691	36	28					0		1
1692	28	1					0		2
1693	13	0					0		0
1694	19	2					2		0
1695	7	1					1		2
1696	40	0					3		4
1697	4	1					0		0
1698	4	0					0		1
1699	80	4					1		1
1700	3	1					2		1
1701	23	0					0		0
1702	2	1					0		2
1703	121	5					1		1
1704	70	1					3		5
1705	0	0					0		1
1706	18	11					0		0
1707	181	0					0		0
1708	14	4					1		1
1709	0	7					3		2
1710	0	4					4		0
1711	30	2					1		0
1712	124	5					1		2
1713	18	2					2		1
1714	16	12					4		1
1715	3	2					5		0
1716	0	0					0		0
1717	7	5					1		2
1718	11	7					0		0
1719	2	0					1		0
1720	22	6					0		0
1721	1	2					1		1
1722	4	12					0		2
1723	12	2					1		0
1724	17	4					1		1
1725	0	2					0		0
1726	35	5					2		0
1727	64	3					2		1
1728	42	10					0		1
1729	47	2					0		1
1730	50	2					0		1
1731	57	3					0		0
1732	6	1					1		2
1733	9	2					0		1
1734	13	1					0		3
1735	65	2					2		0
1736	34	8					0		3
1737	23	3					0		0
1738	12	4							0
1739	15	0							3
1740	58	5							2
1741	19	2							1
1742	8	1							0
1743	2	3							0
1744	13	2							0
1745	61	6							2
1746	33	3							0
1747	2	0							0
1748	62	3							0
1749	55	1							0
1750	42	1							0
1751	21	3							5
1752	2	1							0
1753	3	0							0
1754	7	3							1
1755	3	2							2
1756	27	2							1
1757	220	8							2
1758	3	3							0
1759	8	1							0
1760	0	3							3
1761	8	1							0
1762	1	2							3
1763	16	3							0
1764	4	0							1
1765	133	2							1
1766	8	5							0
1767	31	2							2
1768	30	3							3
1769	33	2							1
1770	6	2							1
1771	397	5							1
1772	32	6							3
1773	288	20							1
1774	11	6							1
1775	4	1							0
1776	30	1							0
1777	20	2							5
1778	1	0							0
1779	347	0							2
1780	5	0							1
1781	2	0							0
1782	13	0							0
1783	22	0							3
1784	4	0							0
1785	101	2							2
1786	8	0							0
1787	479	12							2
1788	3	5							2
1789	2	2							1
1790	0	1							0
1791	2	7							0
1792	5	2							1
1793	9	0							1
1794	1	0							1
1795	0	1							0
1796	0	5							1
1797	6	0							0
1798	3	1							1
1799	7	3							0
1800	3	4							0
1801	2	2							1
1802	0	1							1
1803	15	4							0
1804	0	1							4
1805	2	8							2
1806	0	7							1
1807	0	0							0
1808	0	1							0
1809	0	4							0
1810	189	11							0
1811	0	9							0
1812	0	0							1
1813	2	0							1
1814	136	1							0
1815	39	0							4
1816	0	0							3
1817	5	7							3
1818	55	0							2
1819	0	0							0
1820	1	7							0
1821	2	6							3
1822	0	0							2
1823	5	5							0
1824	36	8							0
1825	0	0							0
1826	0	0							2
1827	422	10							2
1828	175	5							2
1829	3	9							0
1830	170	5							0
1831	17	6							1
1832	7	5							0
1833	3	1							0
1834	121	5							0
1835	6	0							1
1836	67	2							2
1837	21	13							0
1838	22	8							1
1839	103	7							4
1840	78	0							0
1841	3	3							3
1842	0	1							1
1843	404	11							0
1844	56	2							1
1845	34	0							1
1846	17	1							2
1847	13	0							2
1848	192	44							0
1849	105	9							1
1850	0	0							1
1851	0	2							1
1852	49	1							0
1853	10	1							1
1854	20	2							0
1855	1	0							2
1856	134	12							1
1857	27	5							1
1858	3	3							1
1859	318	39							2
1860	51	4							0
1861	130	11							1
1862	1	1							1
1863	4	2							3
1864	176	4							0
1865	0	2							1
1866	2	0							1
1867	9	0							1
1868	192	2							1
1869	60	18							0
1870	6	4							3
1871	29	5							3
1872	31	5							1
1873	21	1							3
1874	47	1							0
1875	4	7							0
1876	8	1							1
1877	5	4							0
1878	2	2							3
1879	7	3							0
1880	3	0							0
1881	12	1							0
1882	5	2							0
1883	10	5							0
1884	5	5							2
1885	291	0							0
1886	32	8							0
1887	3	1							1
1888	38	3							1
1889	27	2							5
1890	35	0							0
1891	98	2							0
1892	52	0							2
1893	0	0							0
1894	1	16							2
1895	1	0							2
1896	7	1							2
1897	28	1							0
1898	1	0							2
1899	1	2							1
1900	2	1							4
1901	8	2							4
1902	207	24							0
1903	40	5							0
1904	10	19							0
1905	1	8							0
1906	0	3							0
1907	0	0							0
1908	94	8							0
1909	69	4							3
1910	25	8							0
1911	182	6							2
1912	236	8							0
1913	97	3							0
1914	14	1							1
1915	142	2							0
1916	2	0							0
1917	27	1							0
1918	18	0							0
1919	5	0							0
1920	2	1							1
1921	0	0							3
1922	7	1							3
1923	0	17							0
1924	55	5							0
1925	41	10							1
1926	119	8							1
1927	486	34							1
1928	73	1							0
1929	5	9							3
1930	0	5							0
1931	0	0							3
1932	127	3							0
1933	39	0							1
1934	99	13							0
1935	160	5							0
1936	169	5							1
1937	3	1							0
1938	167	7							2
1939	27	1							4
1940	1	3							2
1941	134	22							0
1942	3	3							0
1943	0	1							3
1944	73	10							1
1945	0	0							0
1946	0	0							0
1947	44	7							0
1948	11	0							0
1949	21	3							3
1950	3	4							0
1951	102	8							1
1952	76	5							0
1953	74	11							3
1954	21	4							3
1955	14	4							0
1956	7	1							0
1957	39	2							0
1958	24	2							2
1959	166	3							0
1960	89	3							1
1961	1	0							1
1962	7	5							3
1963	5	2							0
1964	45	2							1
1965	136	9							1
1966	60	4							0
1967	166	9							2
1968	419	35							3
1969	1	0							1
1970	239	20							0
1971	139	7							2
1972	172	10							2
1973	113	2							2
1974	21	0							1
1975	81	4							0
1976	2	7							1
1977	150	2							2
1978	10	5							0
1979	23	0							0
1980	54	1							1
1981	1	3							1
1982	6	3							0
1983	9	2							2
1984	8	10							2
1985	0	1							0
1986	0	0							1
1987	1	0							3
1988	47	5							0
1989	80	4							4
1990	5	5							0
1991	0	0							1
1992	64	2							1
1993	41	6							0
1994	183	30							0
1995	14	0							1
1996	15	2							2
1997	136	8							0
1998	6	0							0
[truncated: 286 more rows]

## Sheet: Fig3 and Fig4
	Time (min)	0	15	30	60	120	240	480
	IL1b mRNA Copies/Cell	48.8124	60.7391	98.4152	177.687	192.571	220.692	115.557
	IL1b mRNA Stdev	3.77279	18.7369	19.1377	22.1199	54.6642	13.8619	22.5837
	TNFa mRNA Copies/Cell	5.46857	10.3	70.9798	119.3	56.8712	59.6625	22.385
	TNFa mRNA Stdev	0.535654	1.32066	12.2491	11.7912	31.5158	30.1055	3.52818
	IL1b Introns Copies/Cell	0.13	0.34055	0.73315	0.8743	0.660767	0.6026	0.443533
	IL1b Introns Stdev	0.0357823	0.0525373	0.248672	0.235497	0.215629	0.224926	0.0729045
	TNFa Introns Copies/Cell	0.0151	0.29015	0.677475	0.406	0.294867	0.2397	0.1687
	TNFa Introns Stdev	0.0048816	0.0315029	0.359602	0.188261	0.22722	0.220681	0.0723071
	IL1b Protein Copies/Cell	1.13854e+08	145980000	1.21543e+08	1.42923e+08	141670000	1.66617e+08	257720000
	IL1b Protein Stdev	1.51087e+07	2.34467e+07	2.38375e+07	9.35285e+06	2.17222e+07	3.96921e+07	2.45234e+07
	TNFa Protein Copies/Cell	4.46923e+08	4.99603e+08	516450000	4.69997e+08	6.00097e+08	5.48267e+08	471380000
	TNFa Protein Stdev	5.68488e+07	5.68362e+07	4.73159e+07	2.6762e+07	1.27659e+08	1.07166e+08	3.73494e+07

## Sheet: Fig6 mRNA-mRNA Correlation
IL1b TNFa Correltation
	Time	0	15	30	60	120	240	480
IL1b TNFa Correltation	Average	0.341825	0.448	0.661325	0.8108	0.69595	0.719875	0.65645
	stdev	0.0618455	0.0855259	0.108288	0.0221637	0.0487394	0.0982172	0.0677179

## Sheet: Fig7 Intron Correltaion
	Time (min)	0	15	30	60	120	240	480
IL1b-TNFa Intron Correlation	Average	0.1166	0.30305	0.452725	0.3765	0.366567	0.410233	0.288233
	stdev	0.0828663	0.0356745	0.0874565	0.079192	0.0585544	0.205899	0.0824749

## Sheet: Fig8 IL1b mRNA-Protein
		0	15	30	60	120	240	480
	r IL1b mRNA-Protein	0.444333	0.524767	0.600833	0.6725	0.6535	0.744433	0.804367
	Stdev mRNA-Protein	0.0324827	0.0881171	0.0396679	0.0387207	0.0339411	0.0391702	0.0236094

## Sheet: Fig9 TNFa mRNA-Protein
		0	15	30	60	120	240	480
	r TNFa mRNA-Protein	0.3582	0.319967	0.505667	0.5889	0.50715	0.544067	0.20045
	Stdev mRNA-Protein	0.0550984	0.171419	0.0661757	0.0396947	0.0956715	0.120039	0.0528209
